# Supplementary material for: Reassessment of Reliability and Reproducibility for Triple-Negative Breast Cancer Subtyping
Source: MDPI journal article supplement (doi:10.3390/cancers14112571), 2022-05-24
Supplement: s1 [file s1]

# Supplementary Materials: Reassessment of Reliability and Reproducibility for Triple-Negative Breast Cancer Subtyping

Xinjian Yu, Yongjing Liu and Ming Chen

**Table S1.** Description of public datasets, downloaded from Gene Expression Omnibus.

| Study     | Country | Population <sup>a</sup> | Sample size | Platform       | Sample preservation <sup>b</sup> |
|-----------|---------|-------------------------|-------------|----------------|----------------------------------|
| GSE103091 | France  | TNBC                    | 238         | HG-U133_Plus_2 | FF                               |
| GSE103668 | Denmark | TNBC                    | 21          | HG-U133_Plus_2 | FF                               |
| GSE76124  | USA     | TNBC                    | 198         | HG-U133_Plus_2 | FF                               |
| GSE106977 | Spain   | TNBC                    | 119         | HTA-2_0        | FFPE                             |
| GSE76250  | China   | TNBC                    | 165         | HTA-2_0        | FF                               |
| GSE86945  | Italy   | TNBC                    | 100         | HTA-2_0        | FFPE                             |
| GSE86946  | Mexico  | TNBC                    | 58          | HTA-2_0        | FFPE                             |
| GSE21653  | France  | BC                      | 266         | HG-U133_Plus_2 | FF                               |
| GSE26639  | France  | BC                      | 226         | HG-U133_Plus_2 | FF                               |
| GSE147472 | Italy   | BC                      | 131         | HG-U133_Plus_2 | FFPE                             |
| GSE134359 | Mexico  | BC                      | 86          | HTA-2_0        | FF                               |

<sup>a</sup> TNBC: triple-negative breast cancer; BC: breast cancer; <sup>b</sup> FF: fresh frozen; FFPE: formalin-fixed, paraffin-embedded.

## Sample code for reanalyzing results of TNBCtype

```

result <- read.csv("path/to/tnbctype/result.csv", )
coef <- read.csv("path/to/tnbctype/coef.csv")
pvalue <- read.csv("path/to/tnbctype/pvalue.csv")

new_result <- data.frame(sample = result$X, subtype = NA) # data frame to store new subtyping results
new_coef <- coef.76124[, -c(2,4)] # remove 2 subtypes MSL and IM
new_p <- p.76124[, -c(2,4)]

for (i in 1:nrow(new_coef)) {
  coef <- new_coef[i, ][-1]
  max_co <- max(coef)
  sec_co <- max(coef[coef != max(coef)])
  index <- which.max(new_coef[i, ][-1])
  if (max_co < 0.1 | new_p[i, ][index+1] > 0.05) {
    # if the max_coef < 0.1 or p value of the sbt with max coef > 0.05
    # consider this subtyping unreliable
    new_result$subtype[i] <- "UNS"
  } else if (abs(max_co - sec_co) < 0.05) {
    # if (max_coef - second_coef) > 0.05, consider this subtyping unreliable
    new_result$subtype[i] <- "UNS"
  } else {
    new_result$subtype[i] <- names(index)
  }
}

# check which samples were re-subtyped
new_result$subtype6 <- result.76124$subtype
new_result[new_result$subtype6 != new_result$subtype, ]

```
